# Supplementary material for: Modular epistasis and the compensatory evolution of gene deletion mutants
Source: PLoS Genet. 2019 Feb 15;15(2):e1007958. doi: 10.1371/journal.pgen.1007958 (PMC6395002; doi:10.1371/journal.pgen.1007958)
Supplement: S3 Data — (GB) [file pgen.1007958.s014.gb]

LOCUS       pFA6a-UWMX              5136 bp ds-DNA     circular     11-JUL-2018
DEFINITION  .
FEATURES             Location/Qualifiers
     gene            complement(3861..4721)
                     /label="AmpR"
     promoter        1497..1861
                     /label="pCgTRP1"
     misc_feature    complement(2824..2844)
                     /label="pT7"
     misc_feature    36..58
                     /label="SP6"
     terminator      1293..1495
                     /label="tADH1"
     promoter        89..467
                     /label="pTEF"
     terminator      2524..2748
                     /label="tTEF"
     gene            1862..2515
                     /label="CgTRP1"
     gene            468..1280
                     /label="CaURA3"
ORIGIN
        1 AATTAATACA TAACCTTATG TATCATACAC ATACGATTTA GGTGACACTA TAGAACGCGG
       61 CCGCCAGCTG AAGCTTTCTG GCAGgtttag cttgcctcgt ccccgccggg tcacccggcc
      121 agcgacatgg aggcccagaa taccctcctt gacagtcttg acgtgcgcag ctcaggggca
      181 tgatgtgact gtcgcccgta catttagccc atacatcccc atgtataatc atttgcatcc
      241 atacattttg atggccgcac ggcgcgaagc aaaaattacg gctcctcgct gcagacctgc
      301 gagcagggaa acgctcccct cacagacgcg ttgaattgtc cccacgccgc gcccctgtag
      361 agaaatataa aaggttagga tttgccactg aggttcttct ttcatatact tccttttaaa
      421 atcttgctag gatacagttc tcacatcaca tccgaacata aacaaccatg acagtcaaca
      481 ctaagaccta tagtgagaga gcagaaactc atgcctcacc agtagcacag cgattatttc
      541 gattaatgga actgaagaaa accaatttat gtgcatcaat tgacgttgat accactaagg
      601 aattccttga attaattgat aaattaggtc cttatgtatg cttaatcaag actcatattg
      661 atataatcaa tgatttttcc tatgaatcca ctattgaacc attattagaa ctttcacgta
      721 aacatcaatt tatgattttt gaagatagaa aatttgctga tattggtaat accgtaaaga
      781 aacaatatat tggtggagtt tataaaatta gtagttgggc agatattacc aatgctcatg
      841 gtgtcactgg gaatggagtg gttgaaggat taaaacaggg agctaaagaa accaccacca
      901 accaagagcc aagagggtta ttgatgttag ctgaattatc atcagtggga tcattagcat
      961 atggagaata ttctcaaaaa actgttgaaa ttgctaaatc cgataaggaa tttgttattg
     1021 gatttattgc ccaacgtgat atgggtggcc aagaagaagg atttgattgg cttattatga
     1081 cacctggagt tggattagat gataaaggtg atggattagg acaacaatat agaactgttg
     1141 atgaagttgt tagcactgga actgatatta tcattgttgg tagaggattg tttggtaaag
     1201 gaagagatcc agatattgaa ggtaaaaggt atagaaatgc tggttggaat gcttatttga
     1261 aaaagactgg ccaattataa tcagtactgc gccacttcta aataagcgaa tttcttatga
     1321 tttatgattt ttattattaa ataagttata aaaaaaataa gtgtatacaa attttaaagt
     1381 gactcttagg ttttaaaacg aaaattctta ttcttgagta actctttcct gtaggtcagg
     1441 ttgctttctc aggtatagta tgaggtcgct cttattgacc acacctctac cggcaCGATC
     1501 CTAAGCACAC AGGGATTGTT GTACAATTAC TTTTTATGAT TTTAGATACA CACAAATCTT
     1561 TTCTACGATT ACCTTTCATT TATTTTCGTT TCATGTTTTA TTAATCATTC TTTTTGTATA
     1621 TTTCACATCG GGTGGGGTTT TTATATTAAA TTTTAATAAC ATAATCTTTT AAAGTTTCTA
     1681 CTTTCTATCC TGTATATTAT TTCCATATCT ATATCTATAT TTTCAAGCTT GTTCACATCC
     1741 TTATCGGAAT TGTTCCAGCG TTTTTGTACA GAAAATGATG TTATGGTAAC GAGCTATATC
     1801 AGACCTACTA GTCTTATAGA GCTGTACAGA GTCTTGGAAA CATAACCAAC ACACCAACAA
     1861 GATGTCATTT GATTCGTTAC TCGACAAGAA TGATAAGCTG GTAAAAGTTT GCGGGATTCA
     1921 AACCGTCGAG GCTGCCGAAA CTGCGCTTCA AGCAGGCGCT GATTTGATAG GGATCATATG
     1981 TGTCCCCAAC AGGAAGCGGA CTATCGAGAG CGCTGTGGCT CGTGAAATAT CCAAATTGAT
     2041 TCACAAATCA GGTACTACAA AGCTGGTGGG GGTGTTCAGG AATCAATCTG TTGAGGACGT
     2101 ACATCGGCTT TCTGAGGAAT ATGACCTTGA CATAATCCAA TTACATGGTG ATGAATCATG
     2161 GCCAGAGTAC TATAACGTCA TTAAGAAACC AATAATCAAA AGAGTCATAT TCCCTAGAGA
     2221 TGTCGATGTT GTAACACAAG TGTGTCAAAG AAAACCCTTG GTATGTCTAC CATTGTTCGA
     2281 CTCCGAGGCA GGCGGTACAG GTGAAAAGCT GGACTGGTCC AGTATTTCCT CCTGGGCAAG
     2341 CGAACAGAAT AACGTATTTT ATATACTAGC GGGTGGACTA ACTGCAGAAA ACGTCATGGA
     2401 GGCGGTGGGG TTGCCTGGTG TAATTGGTGT TGACGTCTCA GGTGGTGTAG AGACTGACGG
     2461 CGTCAAAGAC AATGACAAGA TAATTAAATA TGTACAAAAT GCAAAGAAAC AATGATCAGT
     2521 ACTGACAATA AAAAGATTCT TGTTTTCAAG AACTTGTCAT TTGTATAGTT TTTTTATATT
     2581 GTAGTTGTTC TATTTTAATC AAATGTTAGC GTGATTTATA TTTTTTTTCG CCTCGACATC
     2641 ATCTGCCCAG ATGCGAAGTT AAGTGCGCAG AAAGTAATAT CATGCGTCAA TCGTATGTGA
     2701 ATGCTGGTCG CTATACTGCT GTCGATTCGA TACTAACGCC GCCATCCAGT GTCGAAAACG
     2761 AGCTCGAATT CATCGATGAT ATCAGATCCA CTAGTGGCCT ATGCGGCCGC GGATCTGCCG
     2821 GTCTCCCTAT AGTGAGTCGT ATTAATTTCG ATAAGCCAGG TTAACCTGCA TTAATGAATC
     2881 GGCCAACGCG CGGGGAGAGG CGGTTTGCGT ATTGGGCGCT CTTCCGCTTC CTCGCTCACT
     2941 GACTCGCTGC GCTCGGTCGT TCGGCTGCGG CGAGCGGTAT CAGCTCACTC AAAGGCGGTA
     3001 ATACGGTTAT CCACAGAATC AGGGGATAAC GCAGGAAAGA ACATGTGAGC AAAAGGCCAG
     3061 CAAAAGGCCA GGAACCGTAA AAAGGCCGCG TTGCTGGCGT TTTTCCATAG GCTCCGCCCC
     3121 CCTGACGAGC ATCACAAAAA TCGACGCTCA AGTCAGAGGT GGCGAAACCC GACAGGACTA
     3181 TAAAGATACC AGGCGTTTCC CCCTGGAAGC TCCCTCGTGC GCTCTCCTGT TCCGACCCTG
     3241 CCGCTTACCG GATACCTGTC CGCCTTTCTC CCTTCGGGAA GCGTGGCGCT TTCTCAATGC
     3301 TCACGCTGTA GGTATCTCAG TTCGGTGTAG GTCGTTCGCT CCAAGCTGGG CTGTGTGCAC
     3361 GAACCCCCCG TTCAGCCCGA CCGCTGCGCC TTATCCGGTA ACTATCGTCT TGAGTCCAAC
     3421 CCGGTAAGAC ACGACTTATC GCCACTGGCA GCAGCCACTG GTAACAGGAT TAGCAGAGCG
     3481 AGGTATGTAG GCGGTGCTAC AGAGTTCTTG AAGTGGTGGC CTAACTACGG CTACACTAGA
     3541 AGGACAGTAT TTGGTATCTG CGCTCTGCTG AAGCCAGTTA CCTTCGGAAA AAGAGTTGGT
     3601 AGCTCTTGAT CCGGCAAACA AACCACCGCT GGTAGCGGTG GTTTTTTTGT TTGCAAGCAG
     3661 CAGATTACGC GCAGAAAAAA AGGATCTCAA GAAGATCCTT TGATCTTTTC TACGGGGTCT
     3721 GACGCTCAGT GGAACGAAAA CTCACGTTAA GGGATTTTGG TCATGAGATT ATCAAAAAGG
     3781 ATCTTCACCT AGATCCTTTT AAATTAAAAA TGAAGTTTTA AATCAATCTA AAGTATATAT
     3841 GAGTAAACTT GGTCTGACAG TTACCAATGC TTAATCAGTG AGGCACCTAT CTCAGCGATC
     3901 TGTCTATTTC GTTCATCCAT AGTTGCCTGA CTCCCCGTCG TGTAGATAAC TACGATACGG
     3961 GAGGGCTTAC CATCTGGCCC CAGTGCTGCA ATGATACCGC GAGACCCACG CTCACCGGCT
     4021 CCAGATTTAT CAGCAATAAA CCAGCCAGCC GGAAGGGCCG AGCGCAGAAG TGGTCCTGCA
     4081 ACTTTATCCG CCTCCATCCA GTCTATTAAT TGTTGCCGGG AAGCTAGAGT AAGTAGTTCG
     4141 CCAGTTAATA GTTTGCGCAA CGTTGTTGCC ATTGCTACAG GCATCGTGGT GTCACGCTCG
     4201 TCGTTTGGTA TGGCTTCATT CAGCTCCGGT TCCCAACGAT CAAGGCGAGT TACATGATCC
     4261 CCCATGTTGT GCAAAAAAGC GGTTAGCTCC TTCGGTCCTC CGATCGTTGT CAGAAGTAAG
     4321 TTGGCCGCAG TGTTATCACT CATGGTTATG GCAGCACTGC ATAATTCTCT TACTGTCATG
     4381 CCATCCGTAA GATGCTTTTC TGTGACTGGT GAGTACTCAA CCAAGTCATT CTGAGAATAG
     4441 TGTATGCGGC GACCGAGTTG CTCTTGCCCG GCGTCAATAC GGGATAATAC CGCGCCACAT
     4501 AGCAGAACTT TAAAAGTGCT CATCATTGGA AAACGTTCTT CGGGGCGAAA ACTCTCAAGG
     4561 ATCTTACCGC TGTTGAGATC CAGTTCGATG TAACCCACTC GTGCACCCAA CTGATCTTCA
     4621 GCATCTTTTA CTTTCACCAG CGTTTCTGGG TGAGCAAAAA CAGGAAGGCA AAATGCCGCA
     4681 AAAAAGGGAA TAAGGGCGAC ACGGAAATGT TGAATACTCA TACTCTTCCT TTTTCAATAT
     4741 TATTGAAGCA TTTATCAGGG TTATTGTCTC ATGAGCGGAT ACATATTTGA ATGTATTTAG
     4801 AAAAATAAAC AAATAGGGGT TCCGCGCACA TTTCCCCGAA AAGTGCCACC TGACGTCTAA
     4861 GAAACCATTA TTATCATGAC ATTAACCTAT AAAAATAGGC GTATCACGAG GCCCTTTCGT
     4921 CTCGCGCGTT TCGGTGATGA CGGTGAAAAC CTCTGACACA TGCAGCTCCC GGAGACGGTC
     4981 ACAGCTTGTC TGTAAGCGGA TGCCGGGAGC AGACAAGCCC GTCAGGGCGC GTCAGCGGGT
     5041 GTTGGCGGGT GTCGGGGCTG GCTTAACTAT GCGGCATCAG AGCAGATTGT ACTGAGAGTG
     5101 CACCATATGG ACATATTGTC GTTAGAACGC GGCTAC
//
