# Supplementary material for: Modular epistasis and the compensatory evolution of gene deletion mutants
Source: PLoS Genet. 2019 Feb 15;15(2):e1007958. doi: 10.1371/journal.pgen.1007958 (PMC6395002; doi:10.1371/journal.pgen.1007958)
Supplement: S4 Data — (GB) [file pgen.1007958.s015.gb]

LOCUS       pHO-UWMX                6351 bp ds-DNA     circular     11-JUL-2018
DEFINITION  .
FEATURES             Location/Qualifiers
     promoter              2322..2686
                           /label="pCgTRP1"
     gene                  complement(5288..6148)
                           /label="AmpR"
     misc_feature          complement(3804..3824)
                           /label="pT7"
     gene                  1293..2105
                           /label="CaURA3"
     terminator            3349..3573
                           /label="tTEF"
     Origin of Replication 4514..5133
                           /label="pUC Ori"
     gene                  2687..3340
                           /label="CgTRP1"
     promoter              914..1292
                           /label="pTEF"
     misc_feature          51..880
                           /label="HOl"
     misc_feature          3911..4403
                           /label="HOr"
     terminator            2118..2320
                           /label="tADH1"
     misc_feature          3630..3652
                           /label="pSP6"
ORIGIN
        1 cgcgtttcgg tgatgacggt gaaaacctct gacacatgca gctgtttaaa cgcaagcaca
       61 aaaaatcaag gagagagaac taccactttg ttcatgtgta caatgttcat tatctccata
      121 agcaaaaaaa aaaaatagaa aacatatgct ataaggttga tattctcacg agtaagcggc
      181 acttgctact tattgacatt gcagattttt ggctacagaa atagtatatt agagattata
      241 attgctaatc aaatcaaaat ataaaattag taaaccaaac catttatacc cttccttagt
      301 agttatggat tgttttttaa tgatatttct gcaaaccaaa gaaagattgt tatccagata
      361 gaatttagtt ttgatattca tttttttgtt gaagattgaa cgccatatct gggcctcata
      421 attcaaaaga cggtgccatt atcggtagcg tttcgcattg tactggattt cagaaatttc
      481 acagttgatg aatcgaaaag aatggtctca ttgcaacacg taaggttaag atgtcccttt
      541 ttaccattat aggcaataaa tgaatcataa aacgaccgta tactggtgaa atagtaggga
      601 gaacgagtac ctgtagtaaa aagtataaat catagttaat cgggcaatgt ccctcgatca
      661 aggagtattg tgtcatgttc gagacaaacg ccaacatttt tgtttctttt ggacaaatgt
      721 tgtttgcatt tatgatccgt tatattttga tctaatgtag agttgcacgt agttcttact
      781 ggcaaagaaa tcgatgcata ccaaaaaaga ataaaggtga tatttgatct ttaccgttta
      841 gttccaacgt aaaattgtgc ctttggactt aaaatggcgt tcagagcaga ttgtactgag
      901 agtgcacctg tttagcttgc ctcgtccccg ccgggtcacc cggccagcga catggaggcc
      961 cagaataccc tccttgacag tcttgacgtg cgcagctcag gggcatgatg tgactgtcgc
     1021 ccgtacattt agcccataca tccccatgta taatcatttg catccataca ttttgatggc
     1081 cgcacggcgc gaagcaaaaa ttacggctcc tcgctgcaga cctgcgagca gggaaacgct
     1141 cccctcacag acgcgttgaa ttgtccccac gccgcgcccc tgtagagaaa tataaaaggt
     1201 taggatttgc cactgaggtt cttctttcat atacttcctt ttaaaatctt gctaggatac
     1261 agttctcaca tcacatccga acataaacaa ccatgacagt caacactaag acctatagtg
     1321 agagagcaga aactcatgcc tcaccagtag cacagcgatt atttcgatta atggaactga
     1381 agaaaaccaa tttatgtgca tcaattgacg ttgataccac taaggaattc cttgaattaa
     1441 ttgataaatt aggtccttat gtatgcttaa tcaagactca tattgatata atcaatgatt
     1501 tttcctatga atccactatt gaaccattat tagaactttc acgtaaacat caatttatga
     1561 tttttgaaga tagaaaattt gctgatattg gtaataccgt aaagaaacaa tatattggtg
     1621 gagtttataa aattagtagt tgggcagata ttaccaatgc tcatggtgtc actgggaatg
     1681 gagtggttga aggattaaaa cagggagcta aagaaaccac caccaaccaa gagccaagag
     1741 ggttattgat gttagctgaa ttatcatcag tgggatcatt agcatatgga gaatattctc
     1801 aaaaaactgt tgaaattgct aaatccgata aggaatttgt tattggattt attgcccaac
     1861 gtgatatggg tggccaagaa gaaggatttg attggcttat tatgacacct ggagttggat
     1921 tagatgataa aggtgatgga ttaggacaac aatatagaac tgttgatgaa gttgttagca
     1981 ctggaactga tattatcatt gttggtagag gattgtttgg taaaggaaga gatccagata
     2041 ttgaaggtaa aaggtataga aatgctggtt ggaatgctta tttgaaaaag actggccaat
     2101 tataatcagt actgcgccac ttctaaataa gcgaatttct tatgatttat gatttttatt
     2161 attaaataag ttataaaaaa aataagtgta tacaaatttt aaagtgactc ttaggtttta
     2221 aaacgaaaat tcttattctt gagtaactct ttcctgtagg tcaggttgct ttctcaggta
     2281 tagtatgagg tcgctcttat tgaccacacc tctaccggca CGATCCTAAG CACACAGGGA
     2341 TTGTTGTACA ATTACTTTTT ATGATTTTAG ATACACACAA ATCTTTTCTA CGATTACCTT
     2401 TCATTTATTT TCGTTTCATG TTTTATTAAT CATTCTTTTT GTATATTTCA CATCGGGTGG
     2461 GGTTTTTATA TTAAATTTTA ATAACATAAT CTTTTAAAGT TTCTACTTTC TATCCTGTAT
     2521 ATTATTTCCA TATCTATATC TATATTTTCA AGCTTGTTCA CATCCTTATC GGAATTGTTC
     2581 CAGCGTTTTT GTACAGAAAA TGATGTTATG GTAACGAGCT ATATCAGACC TACTAGTCTT
     2641 ATAGAGCTGT ACAGAGTCTT GGAAACATAA CCAACACACC AACAAGATGT CATTTGATTC
     2701 GTTACTCGAC AAGAATGATA AGCTGGTAAA AGTTTGCGGG ATTCAAACCG TCGAGGCTGC
     2761 CGAAACTGCG CTTCAAGCAG GCGCTGATTT GATAGGGATC ATATGTGTCC CCAACAGGAA
     2821 GCGGACTATC GAGAGCGCTG TGGCTCGTGA AATATCCAAA TTGATTCACA AATCAGGTAC
     2881 TACAAAGCTG GTGGGGGTGT TCAGGAATCA ATCTGTTGAG GACGTACATC GGCTTTCTGA
     2941 GGAATATGAC CTTGACATAA TCCAATTACA TGGTGATGAA TCATGGCCAG AGTACTATAA
     3001 CGTCATTAAG AAACCAATAA TCAAAAGAGT CATATTCCCT AGAGATGTCG ATGTTGTAAC
     3061 ACAAGTGTGT CAAAGAAAAC CCTTGGTATG TCTACCATTG TTCGACTCCG AGGCAGGCGG
     3121 TACAGGTGAA AAGCTGGACT GGTCCAGTAT TTCCTCCTGG GCAAGCGAAC AGAATAACGT
     3181 ATTTTATATA CTAGCGGGTG GACTAACTGC AGAAAACGTC ATGGAGGCGG TGGGGTTGCC
     3241 TGGTGTAATT GGTGTTGACG TCTCAGGTGG TGTAGAGACT GACGGCGTCA AAGACAATGA
     3301 CAAGATAATT AAATATGTAC AAAATGCAAA GAAACAATGA TCAGTACTGA CAATAAAAAG
     3361 ATTCTTGTTT TCAAGAACTT GTCATTTGTA TAGTTTTTTT ATATTGTAGT TGTTCTATTT
     3421 TAATCAAATG TTAGCGTGAT TTATATTTTT TTTCGCCTCG ACATCATCTG CCCAGATGCG
     3481 AAGTTAAGTG CGCAGAAAGT AATATCATGC GTCAATCGTA TGTGAATGCT GGTCGCTATA
     3541 CTGCTGTCGA TTCGATACTA ACGCCGCCAT CCAgtgtcga aaacgcgcgg ctacaattaa
     3601 tacataacct tatgtatcat acacatacga tttaggtgac actatagaac gcggccgcca
     3661 gctgaagctt acaccatgga atctagaatc tcgagaaggt accagagcta gcatactgca
     3721 ggtcgacgga tccccaaacg agctcgaatt catcgatgat atcagatcca ctagtggcct
     3781 atgcggccgc ggatctgccg gtctccctat agtgagtcgt attaatttcg ataagccagg
     3841 ttaacctgca ttaatgaatc ggccaacgcg cggggagagg cggtttgcgt attgggcgct
     3901 cttccgcttc ctgggggaac aacttcacag aatgttttgt catattgtcg aagtggtcac
     3961 aaaacaagag aagttccgcc aattataaaa agggaacccg tatatttcag cttcacggat
     4021 gatttccagg gtgagagtac tgtatatggg cttacgatag aaggccataa aaatttcttg
     4081 cttggcaaca aaatagaagt gaaatcatgt cgaggctgct gtgtgggaga acagcttaaa
     4141 atatcacaaa aaaagaatct aaaacactgt gttgcttgtc ccagaaaggg aatcaagtat
     4201 ttttataaag attggagtgg taaaaatcga gtatgtgcta gatgctatgg aagatacaaa
     4261 ttcagcggtc atcactgtat aaattgcaag tatgtaccag aagcacgtga agtgaaaaag
     4321 gcaaaagaca aaggcgaaaa attgggcatt acgcccgaag gtttgccagt taaaggacca
     4381 gagtgtataa aatgtggcgg aattgtacag tttaaacaaa ggcggtaata cggttatcca
     4441 cagaatcagg ggataacgca ggaaagaaca tgtgagcaaa aggccagcaa aaggccagga
     4501 accgtaaaaa ggccgcgttg ctggcgtttt tccataggct ccgcccccct gacgagcatc
     4561 acaaaaatcg acgctcaagt cagaggtggc gaaacccgac aggactataa agataccagg
     4621 cgtttccccc tggaagctcc ctcgtgcgct ctcctgttcc gaccctgccg cttaccggat
     4681 acctgtccgc ctttctccct tcgggaagcg tggcgctttc tcatagctca cgctgtaggt
     4741 atctcagttc ggtgtaggtc gttcgctcca agctgggctg tgtgcacgaa ccccccgttc
     4801 agcccgaccg ctgcgcctta tccggtaact atcgtcttga gtccaacccg gtaagacacg
     4861 acttatcgcc actggcagca gccactggta acaggattag cagagcgagg tatgtaggcg
     4921 gtgctacaga gttcttgaag tggtggccta actacggcta cactagaaga acagtatttg
     4981 gtatctgcgc tctgctgaag ccagttacct tcggaaaaag agttggtagc tcttgatccg
     5041 gcaaacaaac caccgctggt agcggtggtt tttttgtttg caagcagcag attacgcgca
     5101 gaaaaaaagg atctcaagaa gatcctttga tcttttctac ggggtctgac gctcagtgga
     5161 acgaaaactc acgttaaggg attttggtca tgagattatc aaaaaggatc ttcacctaga
     5221 tccttttaaa ttaaaaatga agttttaaat caatctaaag tatatatgag taaacttggt
     5281 ctgacagtta ccaatgctta atcagtgagg cacctatctc agcgatctgt ctatttcgtt
     5341 catccatagt tgcctgactc cccgtcgtgt agataactac gatacgggag ggcttaccat
     5401 ctggccccag tgctgcaatg ataccgcgag acccacgctc accggctcca gatttatcag
     5461 caataaacca gccagccgga agggccgagc gcagaagtgg tcctgcaact ttatccgcct
     5521 ccatccagtc tattaattgt tgccgggaag ctagagtaag tagttcgcca gttaatagtt
     5581 tgcgcaacgt tgttgccatt gctacaggca tcgtggtgtc acgctcgtcg tttggtatgg
     5641 cttcattcag ctccggttcc caacgatcaa ggcgagttac atgatccccc atgttgtgca
     5701 aaaaagcggt tagctccttc ggtcctccga tcgttgtcag aagtaagttg gccgcagtgt
     5761 tatcactcat ggttatggca gcactgcata attctcttac tgtcatgcca tccgtaagat
     5821 gcttttctgt gactggtgag tactcaacca agtcattctg agaatagtgt atgcggcgac
     5881 cgagttgctc ttgcccggcg tcaatacggg ataataccgc gccacatagc agaactttaa
     5941 aagtgctcat cattggaaaa cgttcttcgg ggcgaaaact ctcaaggatc ttaccgctgt
     6001 tgagatccag ttcgatgtaa cccactcgtg cacccaactg atcttcagca tcttttactt
     6061 tcaccagcgt ttctgggtga gcaaaaacag gaaggcaaaa tgccgcaaaa aagggaataa
     6121 gggcgacacg gaaatgttga atactcatac tcttcctttt tcaatattat tgaagcattt
     6181 atcagggtta ttgtctcatg agcggataca tatttgaatg tatttagaaa aataaacaaa
     6241 taggggttcc gcgcacattt ccccgaaaag tgccacctga cgtctaagaa accattatta
     6301 tcatgacatt aacctataaa aataggcgta tcacgaggcc ctttcgtctc g
//
