# Supplementary material for: Modular epistasis and the compensatory evolution of gene deletion mutants
Source: PLOS journal article supplement (doi:10.1371/journal.pgen.1007958), 2019-02-15

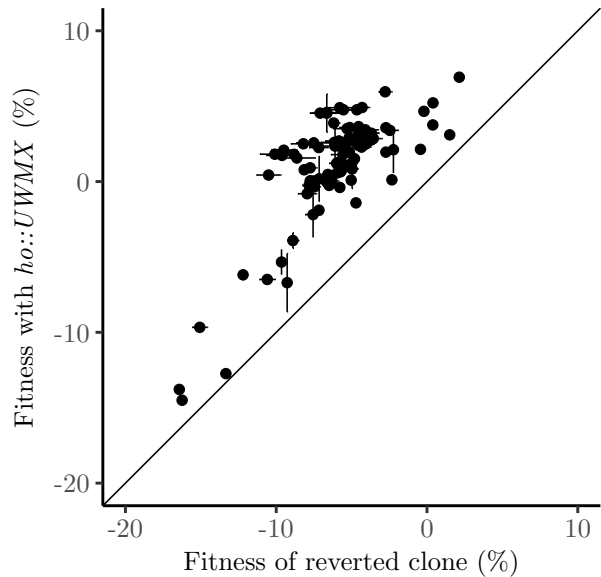

Supplement: S6 (10.1371/journal.pgen.1007958.s006) [file journal.pgen.1007958.s006]
